# Supplementary material for: Assembly of the Complete Mitochondrial Genome of Pereskia aculeata Revealed That Two Pairs of Repetitive Elements Mediated the Recombination of the Genome
Source: MDPI journal article supplement (doi:10.3390/ijms24098366), 2023-05-06

### Supplementary figure legends

**Fig. S1 Sequencing depth of coverage based on Nanopore long-reads.** The abscissa indicates the location of the contig, and the ordinate indicates the sequencing depth. The average sequencing depth of the mitochondrial genome was about 75 ×.

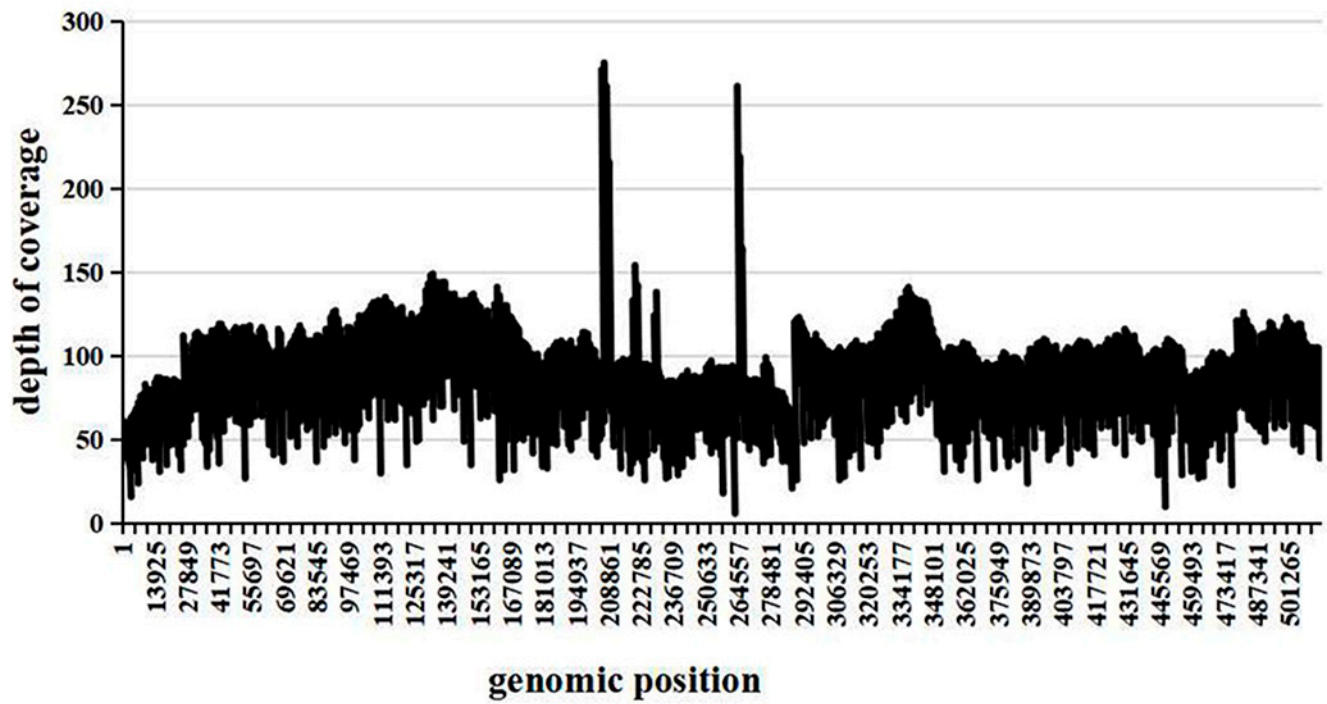

Supplement: s1 [file s1]
